# Supplementary material for: Preliminary pharmacokinetic and psychophysical investigations after controlled oral and inhalative consumption of hexahydrocannabinol (HHC)
Source: Springer Nature journal article supplement (doi:10.1038/s41598-025-93931-4), 2025-03-24
Supplement: MOESM1 [file 41598_2025_93931_MOESM1_ESM-1.pdf]

## Supplementary Information

### **Preliminary pharmacokinetic and psychophysical investigations after controlled oral and inhalative consumption of hexahydrocannabinol (HHC)**

Lisa Höfert<sup>1\*</sup>, Benjamin Franz<sup>1</sup>, Cedric Groß<sup>1</sup>, Delen Kuntze<sup>1</sup>, Bronislav Jurásek<sup>2</sup>,  
Martin Kuchař<sup>2</sup>, Jan Dreßler<sup>1</sup>, Susen Becker<sup>#1</sup>, and Sven Baumann<sup>#1</sup>

\* corresponding author (lisa.hoefert@medizin.uni-leipzig.de)

# contributed equally

<sup>1</sup> Institute of Forensic Medicine, Medical Faculty, University of Leipzig, Leipzig, Germany

<sup>2</sup> Forensic Laboratory of Biologically Active Substances, Department of Chemistry of Natural Compounds, University of Chemistry and Technology Prague, Prague, Czech Republic

## Supplemental Tables

Table S1: Sample collection schedule for serum, saliva, and urine following inhalative or oral consumption; \*=additional conduction of DrugWipe® 5S saliva test

|         | Inhalative              |        |       | Oral                |        |       |
|---------|-------------------------|--------|-------|---------------------|--------|-------|
|         | Serum                   | Saliva | Urine | Serum               | Saliva | Urine |
|         | Before consumption*     |        |       | Before consumption* |        |       |
|         | After first inhalation* |        |       | After swallow*      |        |       |
| Minutes | 3                       | 3*     |       |                     |        |       |
|         | 6                       | 6      |       |                     |        |       |
|         | 9                       | 9      |       | 10                  | 10*    |       |
|         | 12                      | 12*    |       |                     |        |       |
|         | 15                      | 15     |       |                     |        |       |
|         | 18                      | 18     |       |                     |        |       |
|         | 21                      | 21     |       | 20                  | 20     |       |
|         | 24                      | 24     |       |                     |        |       |
|         | 27                      | 27     |       |                     |        |       |
|         | 30                      | 30*    | 30    | 30                  | 30*    |       |
|         | 35                      | 35     |       |                     |        |       |
|         | 40                      | 40     |       | 40                  | 40     |       |
|         | 45                      | 45     |       |                     |        |       |
|         | 50                      | 50     |       | 50                  | 50     |       |
| 55      | 55                      |        |       |                     |        |       |
| Hours   | 1                       | 1*     | 1     | 1                   | 1      | 1     |
|         | 1.25                    | 1.25   |       | 1.25                | 1.25   |       |
|         | 1.5                     | 1.5    |       | 1.5                 | 1.5*   |       |
|         | 1.75                    | 1.75   |       | 1.75                | 1.75   |       |
|         | 2                       | 2      | 2     | 2                   | 2      | 2     |
|         |                         |        |       | 2.25                | 2.25   |       |
|         | 2.5                     | 2.5    |       | 2.5                 | 2.5    |       |
|         |                         |        |       | 2.75                | 2.75   |       |
|         | 3                       | 3*     | 3     | 3                   | 3*     | 3     |
|         | 4                       | 4      | 4     | 4                   | 4*     | 4     |
|         | 5                       | 5      |       | 5                   | 5      |       |
|         | 6                       | 6*     | 6     | 6                   | 6*     | 6     |
|         | 7                       | 7      |       | 7                   | 7      |       |
|         | 8                       | 8      | 8     | 8                   | 8      | 8     |
|         |                         |        | 10    |                     |        | 10    |
|         |                         |        | 12    |                     |        | 12    |
|         | 24                      | 24     | 24    | 24                  | 24     | 24    |
|         | 48                      | 48     | 48    | 48                  | 48     | 48    |
|         |                         | 72     |       |                     | 72     |       |
|         |                         | 96     |       |                     | 96     |       |
|         |                         | 120    |       |                     | 120    |       |

Table S2: Calibration levels of the analytes in serum

| Level, ng/mL | (9R)-/(9S)-HHC | (9R)+(9S)-11-OH-HHC | (9R)-/(9S)-HHC-COOH |
|--------------|----------------|---------------------|---------------------|
| 1            | 0.1            | -                   | -                   |
| 2            | 0.25           | 0.25                | 0.25                |
| 3            | 0.5            | 0.5                 | 0.5                 |
| 4            | 1              | 1                   | 1                   |
| 5            | 2.5            | 2.5                 | 2.5                 |
| 6            | 5              | 5                   | 5                   |
| 7            | 10             | 10                  | 10                  |
| 8            | 25             | 20                  | 25                  |
| 9            | 50             | 50                  | 50                  |
| 10           | 100            | -                   | 100                 |

Table S3: Validation data for serum (correlation coefficient *r*, LOD, LLOQ, QC concentrations, accuracy, intra-day and inter-day precision, recovery, matrix effects; L=low, H=high)

| Analyte             | <i>r</i> | LOD, ng/mL | LLOQ, ng/mL | QC concentration, ng/mL |      | Accuracy, % |       | Intra-day precision CV, % |     | Inter-day precision CV, % |      | Recovery, % |      | Matrix effects, % |      |
|---------------------|----------|------------|-------------|-------------------------|------|-------------|-------|---------------------------|-----|---------------------------|------|-------------|------|-------------------|------|
|                     |          |            |             | L                       | H    | L           | H     | L                         | H   | L                         | H    | L           | H    |                   |      |
| (9R)-HHC            | 0.9998   | 0.07       | 0.10        | 0.80                    | 40.0 | 95.0        | 116.4 | 2.9                       | 1.2 | 5.6                       | 2.0  | 41.2        | 42.9 | 94.9              | 77.0 |
| (9S)-HHC            | 0.9996   | 0.09       | 0.10        | 0.80                    | 40.0 | 113.8       | 116.6 | 2.6                       | 1.2 | 2.9                       | 2.3  | 44.2        | 45.0 | 89.8              | 75.4 |
| (9R)+(9S)-11-OH-HHC | 0.9969   | 0.08       | 0.25        | 0.80                    | 40.0 | 95.7        | 96.1  | 4.6                       | 1.7 | 10.6                      | 10.6 | 79.4        | 82.5 | 111.6             | 99.2 |
| (9R)-HHC-COOH       | 0.9990   | 0.05       | 0.25        | 8.00                    | 80.0 | 109.6       | 117.0 | 2.8                       | 1.7 | 2.4                       | 2.4  | 75.9        | 79.1 | 99.0              | 93.9 |
| (9S)-HHC-COOH       | 0.9993   | 0.08       | 0.25        | 8.00                    | 80.0 | 102.7       | 113.2 | 2.0                       | 2.3 | 4.4                       | 4.2  | 79.9        | 79.6 | 101.8             | 97.8 |

Table S4: Validation data for urina and saliva (ranges of calibration, correlation coefficient *r*, LOD, LLOQ, accuracy, intra-day and inter-day precision; L=low, H=high)

| Matrix | Analyte             | Range of calibration, ng/mL | <i>r</i> | LOD, ng/mL | LLOQ, ng/mL | QC concentration, ng/mL |      | Accuracy, % |       | Intra-day precision CV, % |      | Inter-day precision CV, % |      |
|--------|---------------------|-----------------------------|----------|------------|-------------|-------------------------|------|-------------|-------|---------------------------|------|---------------------------|------|
|        |                     |                             |          |            |             | L                       | H    | L           | H     | L                         | H    | L                         | H    |
| Urine  | (9R)-HHC            | 0.10-25.0                   | 0.9980   | 0.06       | 0.10        | 1.00                    | 10.0 | 92.9        | 88.8  | 1.45                      | 1.85 | 10.2                      | 8.38 |
|        | (9S)-HHC            | 0.10-25.0                   | 0.9963   | 0.06       | 0.10        | 1.00                    | 10.0 | 95.1        | 92.3  | 2.37                      | 2.15 | 12.9                      | 9.41 |
|        | (9R)+(9S)-11-OH-HHC | 0.25-25.0                   | 0.9941   | 0.25       | 0.25        | 1.00                    | 10.0 | 110.7       | 102.2 | 1.82                      | 2.83 | 12.4                      | 6.31 |
|        | (9R)-HHC-COOH       | 0.25-25.0                   | 0.9961   | 0.07       | 0.25        | 1.00                    | 10.0 | 114.4       | 117.5 | 2.99                      | 3.14 | 8.09                      | 4.84 |
|        | (9S)-HHC-COOH       | 0.25-25.0                   | 0.9965   | 0.11       | 0.25        | 1.00                    | 10.0 | 115.6       | 114.0 | 2.91                      | 3.83 | 6.63                      | 3.72 |
| Saliva | (9R)-HHC            | 2.50-250                    | 0.9996   | 0.60       | 2.50        | 10.0                    | 100  | 109.5       | 102.7 | 3.28                      | 3.28 | 7.44                      | 9.71 |
|        | (9S)-HHC            | 2.50-250                    | 0.9965   | 0.70       | 2.50        | 10.0                    | 100  | 110.9       | 102.3 | 2.48                      | 2.86 | 7.34                      | 10.5 |
|        | (9R)+(9S)-11-OH-HHC | -                           | -        | 2.30       | -           | -                       | -    | -           | -     | -                         | -    | -                         | -    |
|        | (9R)-HHC-COOH       | -                           | -        | 0.50       | -           | -                       | -    | -           | -     | -                         | -    | -                         | -    |
|        | (9S)-HHC-COOH       | -                           | -        | 0.70       | -           | -                       | -    | -           | -     | -                         | -    | -                         | -    |

Table S5: Parameters of the scheduled multiple reaction monitoring method

| Analyte         | Retention time, min | Transition, m/z | Declustering potential (DP), V | Collision energy (CE), V | Collision cell exit potential (CXP), V |
|-----------------|---------------------|-----------------|--------------------------------|--------------------------|----------------------------------------|
| (9R)-HHC        | 13.15               | 317.2 → 193.2   | 80                             | 35                       | 16                                     |
|                 |                     | 317.2 → 123.1   | 80                             | 47                       | 16                                     |
| (9S)-HHC        | 13.01               | 317.2 → 193.2   | 80                             | 35                       | 16                                     |
|                 |                     | 317.2 → 123.1   | 80                             | 47                       | 16                                     |
| 11-OH-HHC       | 8.34                | 333.2 → 193.2   | 80                             | 33                       | 12                                     |
|                 |                     | 333.2 → 123.1   | 80                             | 35                       | 14                                     |
| (9R)-HHC-COOH   | 7.95                | 347.2 → 193.2   | 80                             | 37                       | 28                                     |
|                 |                     | 347.2 → 121.2   | 80                             | 40                       | 10                                     |
| (9S)-HHC-COOH   | 8.26                | 347.2 → 193.2   | 80                             | 37                       | 28                                     |
|                 |                     | 347.2 → 121.2   | 80                             | 40                       | 10                                     |
| Δ9-THC          | 12.37               | 315.2 → 193.1   | 80                             | 31                       | 16                                     |
|                 |                     | 315.2 → 123.1   | 80                             | 43                       | 16                                     |
| Δ9-11-OH-THC    | 8.02                | 331.2 → 313.2   | 80                             | 21                       | 20                                     |
|                 |                     | 331.2 → 193.1   | 80                             | 33                       | 13                                     |
| Δ9-THC-COOH     | 8.14                | 345.2 → 327.2   | 80                             | 23                       | 22                                     |
|                 |                     | 345.2 → 299.2   | 100                            | 27                       | 13                                     |
| CBD             | 10.19               | 315.2 → 193.1   | 80                             | 31                       | 16                                     |
|                 |                     | 315.2 → 123.1   | 60                             | 60                       | 12                                     |
| 7-OH-CBD        | 5.93                | 331.2 → 313.2   | 80                             | 17                       | 8                                      |
|                 |                     | 331.2 → 105.1   | 80                             | 51                       | 12                                     |
| 7-COOH-CBD      | 5.66                | 345.3 → 327.2   | 80                             | 21                       | 24                                     |
|                 |                     | 345.3 → 299.2   | 80                             | 27                       | 8                                      |
| CBN             | 11.59               | 311.2 → 223.1   | 80                             | 29                       | 16                                     |
|                 |                     | 311.2 → 293.2   | 80                             | 25                       | 13                                     |
| (9R)-HHC-D9     | 13.15               | 326.3 → 202.2   | 80                             | 35                       | 16                                     |
|                 |                     | 326.3 → 123.0   | 80                             | 37                       | 16                                     |
| Δ9-THC-D3       | 12.37               | 318.2 → 196.1   | 80                             | 31                       | 16                                     |
|                 |                     | 318.2 → 123.1   | 80                             | 43                       | 16                                     |
| Δ9-11-OH-THC-D3 | 8.02                | 334.2 → 316.2   | 80                             | 21                       | 20                                     |
|                 |                     | 334.2 → 196.1   | 80                             | 33                       | 13                                     |
| Δ9-THC-COOH-D3  | 8.14                | 348.2 → 330.2   | 80                             | 23                       | 22                                     |
|                 |                     | 348.2 → 302.2   | 100                            | 27                       | 13                                     |

# Supplemental Figures

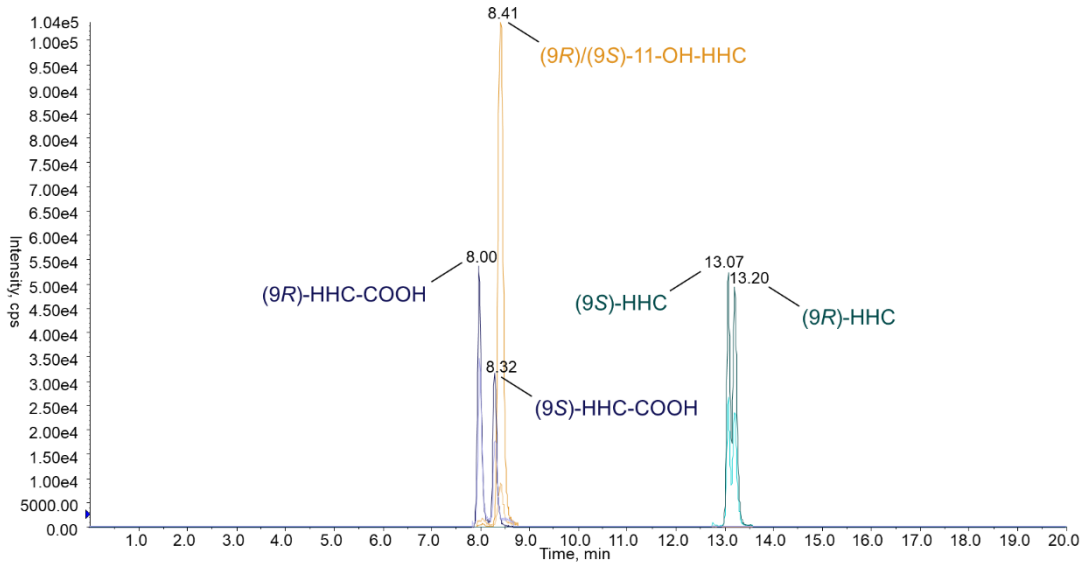

Figure S1: Extracted ion chromatogram for a serum sample spiked with 2.5 ng/mL for each analyte (calibrator 5)

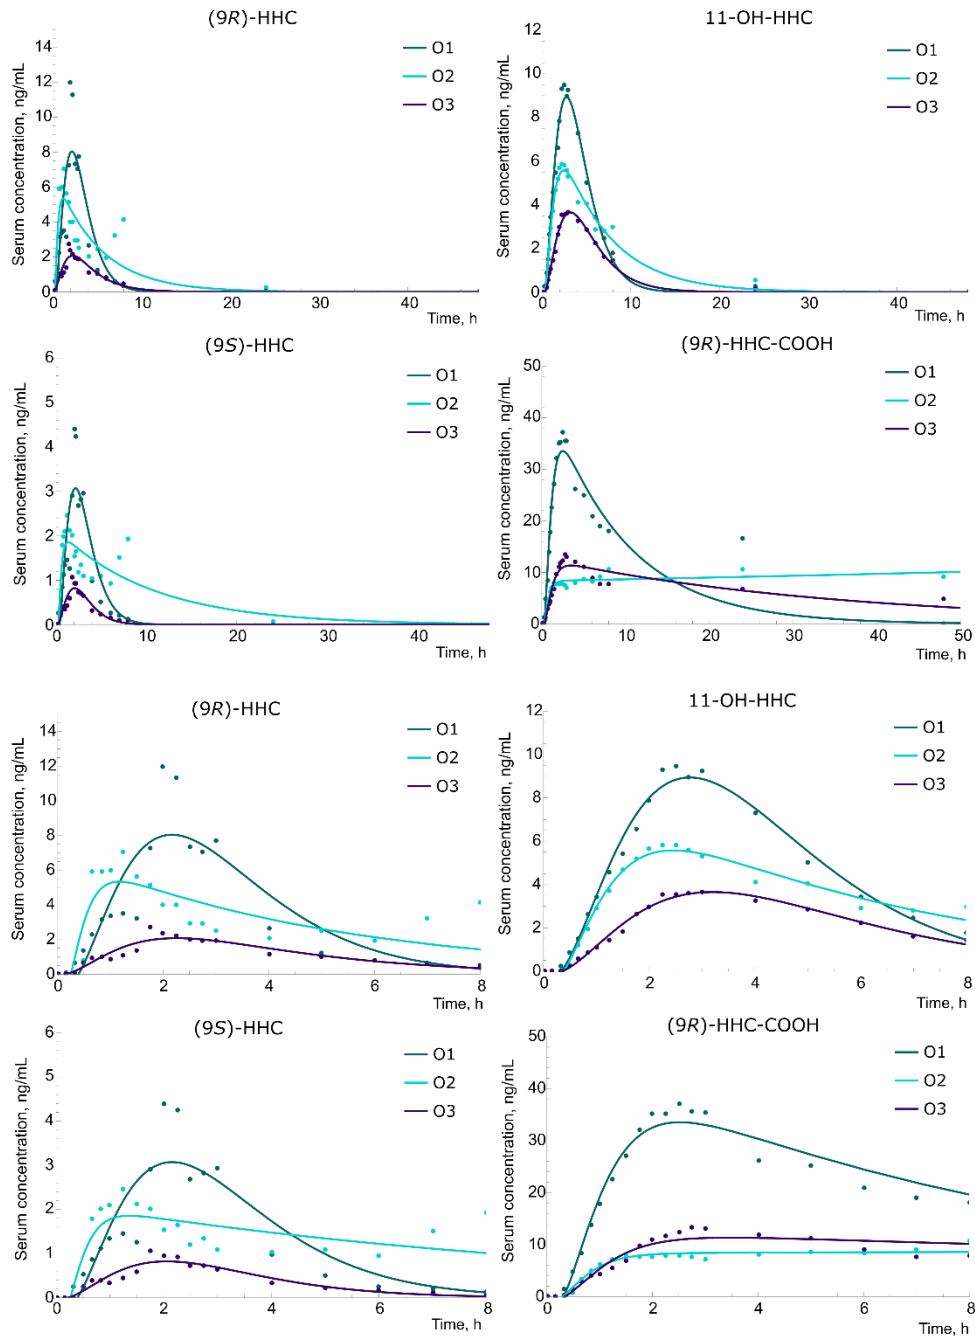

Figure S2: Compartmental analysis for the oral consumption group for (9R)-HHC, (9S)-HHC, 11-OH-HHC, and (9R)-HHC-COOH in serum using the two-compartmental model with first-order absorption

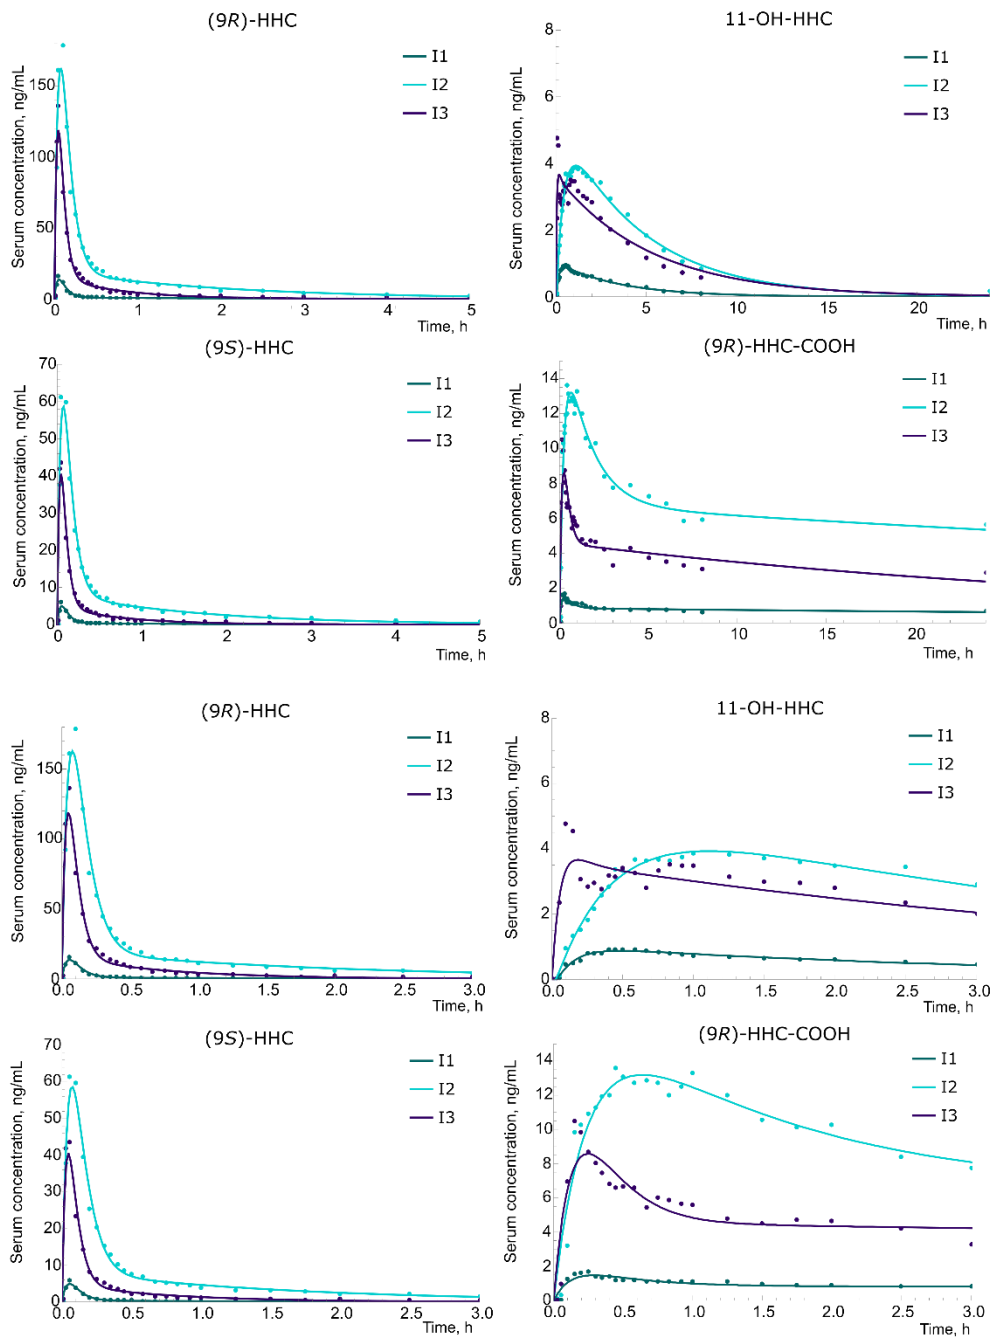

Figure S3: Compartmental analysis for the inhalative consumption group for (9R)-HHC, (9S)-HHC, 11-OH-HHC, and (9R)-HHC-COOH in serum using the two-compartmental model with first-order absorption
